# Supplementary material for: Implications of Cardioprotective Assumptions for National Drinking Guidelines and Alcohol Harm Monitoring Systems
Source: MDPI journal article supplement (doi:10.3390/ijerph16244956), 2019-12-06
Supplement: s1 [file s1]

Supplementary Table S1: Alcohol-related deaths and condition weights, by condition and category, Australia and Canada, 2015

| Health condition                | Australia     |               | Canada         |               |
|---------------------------------|---------------|---------------|----------------|---------------|
|                                 | Deaths        | Weight        | Deaths         | Weight        |
| Breast cancer                   | 2,759         | 5.4%          | 5,188          | 4.9%          |
| Colon and rectum cancer         | 4,061         | 8.0%          | 8,468          | 8.1%          |
| Larynx cancer                   | 206           | 0.4%          | 408            | 0.4%          |
| Liver cancer                    | 1,686         | 3.3%          | 2,900          | 2.8%          |
| Esophageal cancer               | 1,246         | 2.4%          | 1,956          | 1.9%          |
| Lip and oral cavity cancer      | 653           | 1.3%          | 950            | 0.9%          |
| Atrial fibrillation and flutter | 2,026         | 4.0%          | 3,737          | 3.6%          |
| Hemorrhagic stroke              | 2,336         | 4.6%          | 3,775          | 3.6%          |
| Hypertensive heart disease      | 2,164         | 4.3%          | 3,371          | 3.2%          |
| Ischemic heart disease          | 18,435        | 36.2%         | 34,030         | 32.4%         |
| Ischemic stroke                 | 1,783         | 3.5%          | 9,912          | 9.4%          |
| Diabetes mellitus               | 2,015         | 4.0%          | 6,808          | 6.5%          |
| Cirrhosis                       | 1,369         | 2.7%          | 3,169          | 3.0%          |
| Pancreatitis                    | 182           | 0.4%          | 449            | 0.4%          |
| Tuberculosis                    | 44            | 0.1%          | 107            | 0.1%          |
| Lower respiratory infections    | 3,261         | 6.4%          | 7,732          | 7.4%          |
| Epilepsy                        | 243           | 0.5%          | 265            | 0.3%          |
| Interpersonal violence          | 190           | 0.4%          | 437            | 0.4%          |
| Self-harm                       | 2,747         | 5.4%          | 4,349          | 4.1%          |
| Transport injuries              | 1,015         | 2.0%          | 1,877          | 1.8%          |
| Unintentional injuries          | 2,441         | 4.8%          | 5,175          | 4.9%          |
|                                 |               |               |                |               |
| <b>Total</b>                    | <b>50,862</b> | <b>100.0%</b> | <b>105,063</b> | <b>100.0%</b> |
|                                 |               |               |                |               |
| Health category                 | Australia     |               | Canada         |               |
|                                 | Deaths        | Weight        | Deaths         | Weight        |
| Cancer                          | 10,611        | 20.9%         | 19,870         | 18.9%         |
| Cardiovascular conditions       | 26,744        | 52.6%         | 54,825         | 52.2%         |
| Diabetes                        | 2,015         | 4.0%          | 6,808          | 6.5%          |
| Digestive conditions            | 1,551         | 3.0%          | 3,618          | 3.4%          |
| Infectious diseases             | 3,305         | 6.5%          | 7,839          | 7.5%          |
| Neuropsychiatric conditions     | 243           | 0.5%          | 265            | 0.3%          |
| Injuries                        | 6,393         | 12.6%         | 11,838         | 11.3%         |
|                                 |               |               |                |               |
| <b>Total</b>                    | <b>50,862</b> | <b>100.0%</b> | <b>105,063</b> | <b>100.0%</b> |

Notes: Only partially-attributable alcohol-related conditions are included in weighted RR functions.

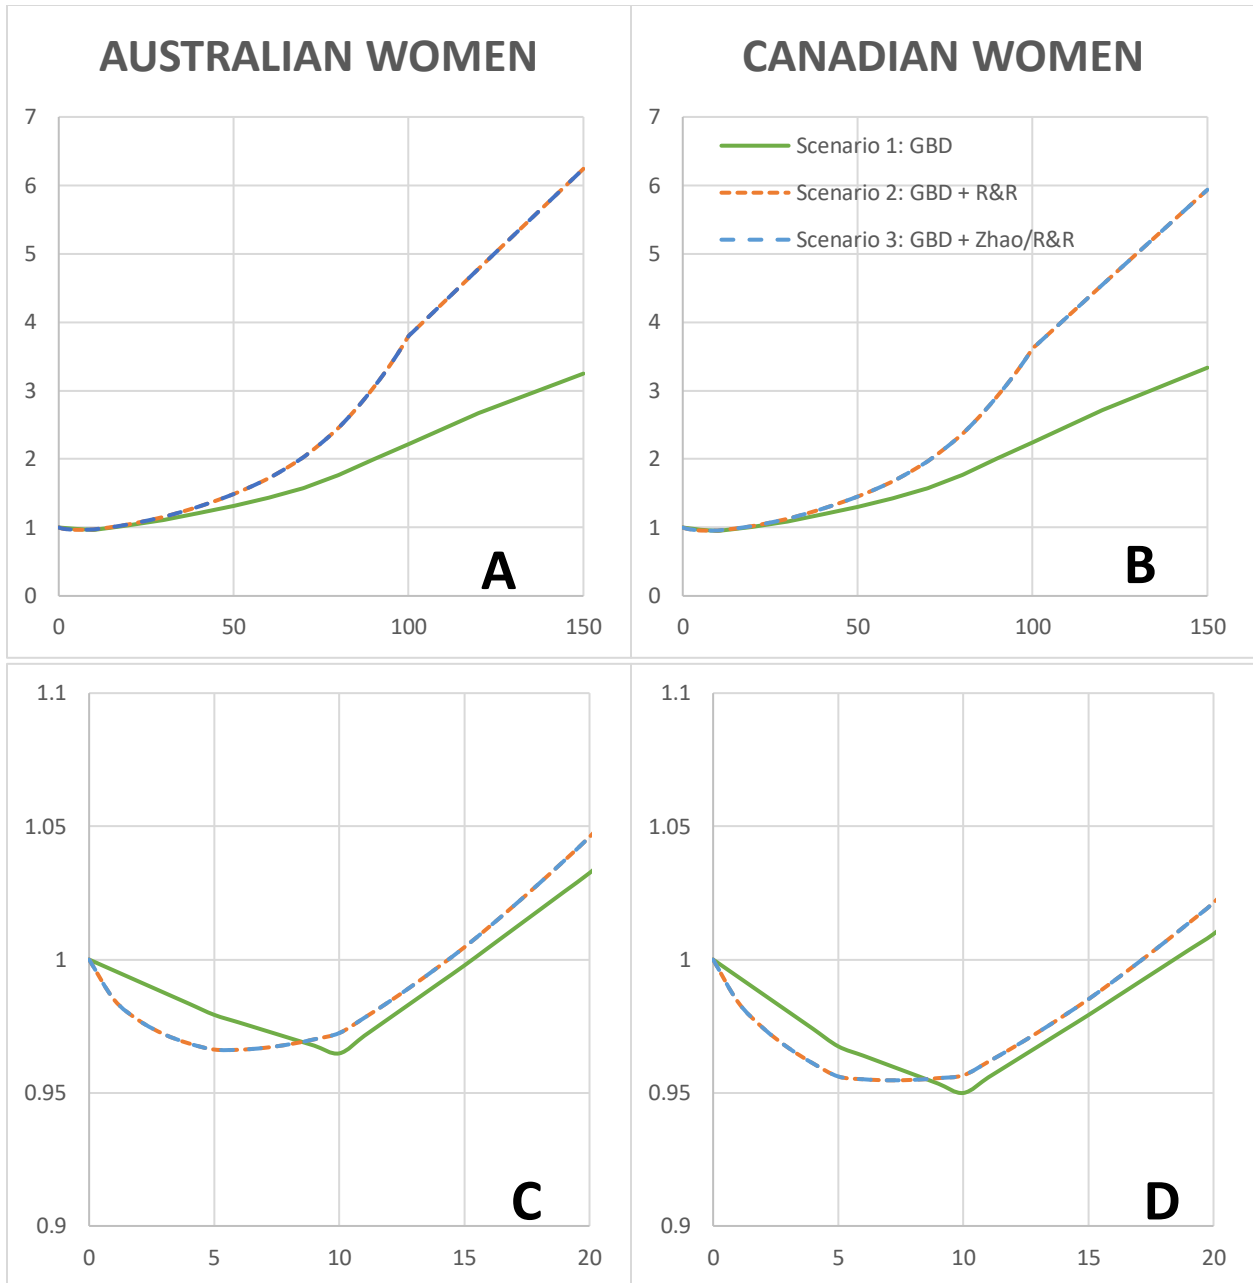

Supplemental Figure S1. Weighted relative risk functions, women, by cardioprotective scenario, Australia and Canada, 2015. Panel A: Australia, Net harm, Women; Panel B: Canada, Net harm, Women  
 Panel C: Same functions as in Panel A, magnified to a range of 0-20 g/day for resolution  
 Panel D: Same functions as in Panel B, magnified to a range of 0-20 g/day for resolution  
 y-axis: relative risk; x-axis: average daily alcohol consumption in grams ethanol/day  
 Note: For women, Scenarios 2 and 3 use the same IHD risk function (R&R) and so are corresponding functions are identical.

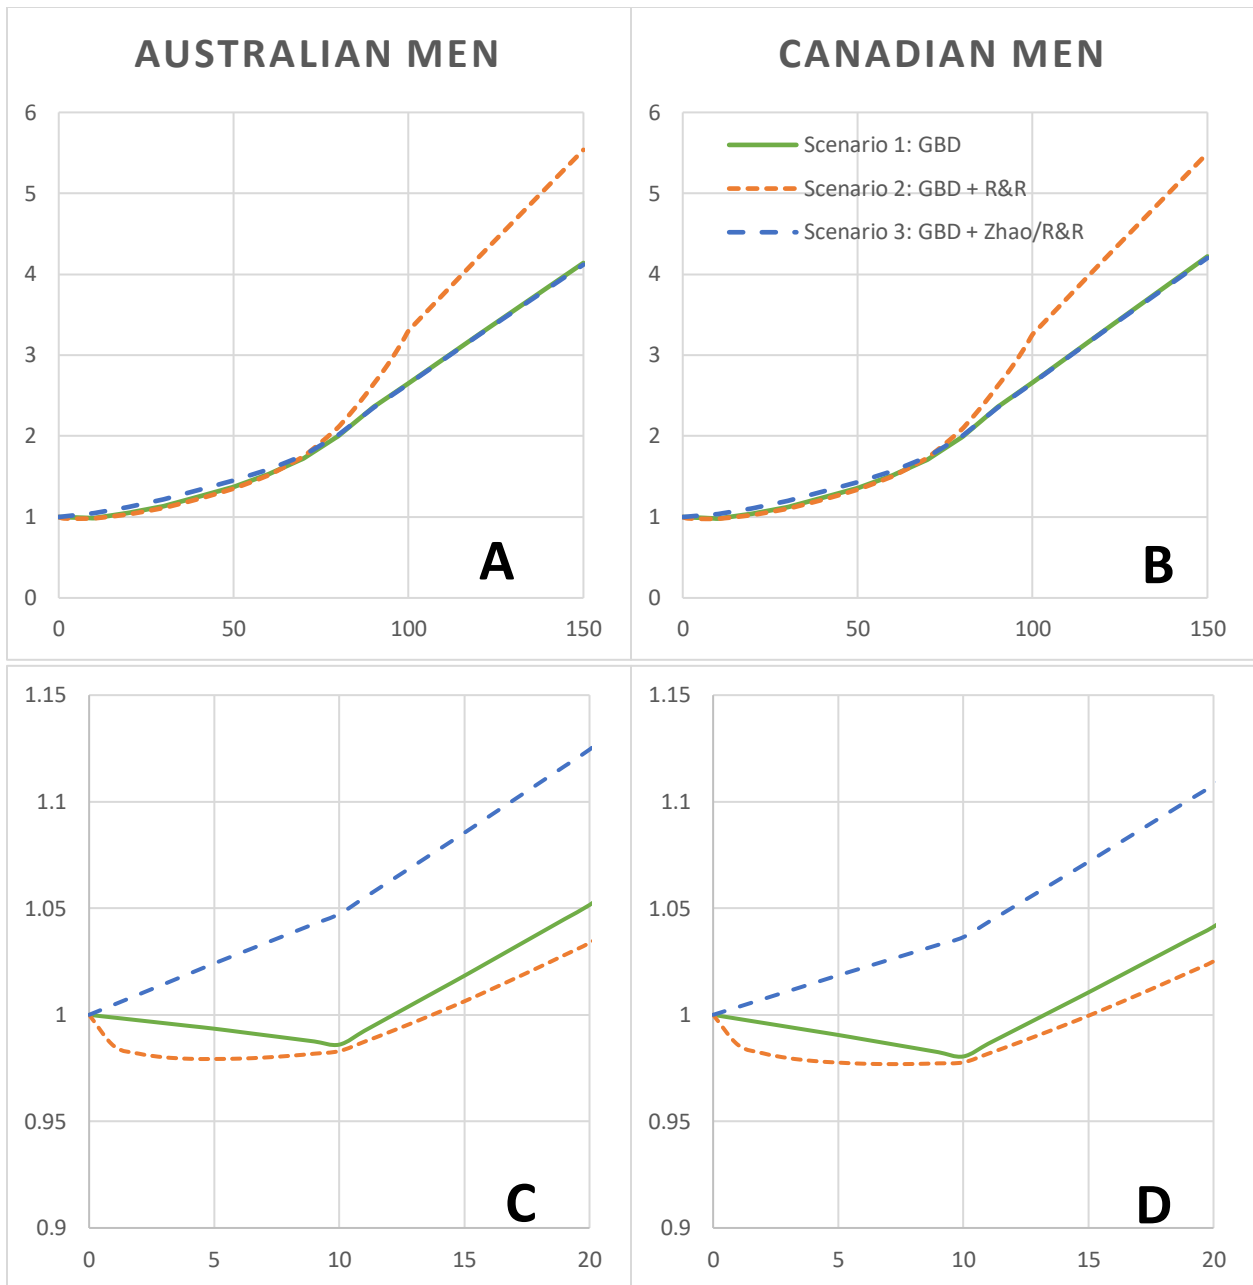

Supplemental Figure S2. Weighted relative risk functions, men, by cardioprotective scenario, Australia and Canada, 2015. Panel A: Australia, Net harm, Men; Panel B: Canada, Net harm, Men  
 Panel C: Same functions as in Panel A, magnified to a range of 0-20 g/day for resolution  
 Panel D: Same functions as in Panel B, magnified to a range of 0-20 g/day for resolution  
 y-axis: relative risk; x-axis: average daily alcohol consumption in grams ethanol/day

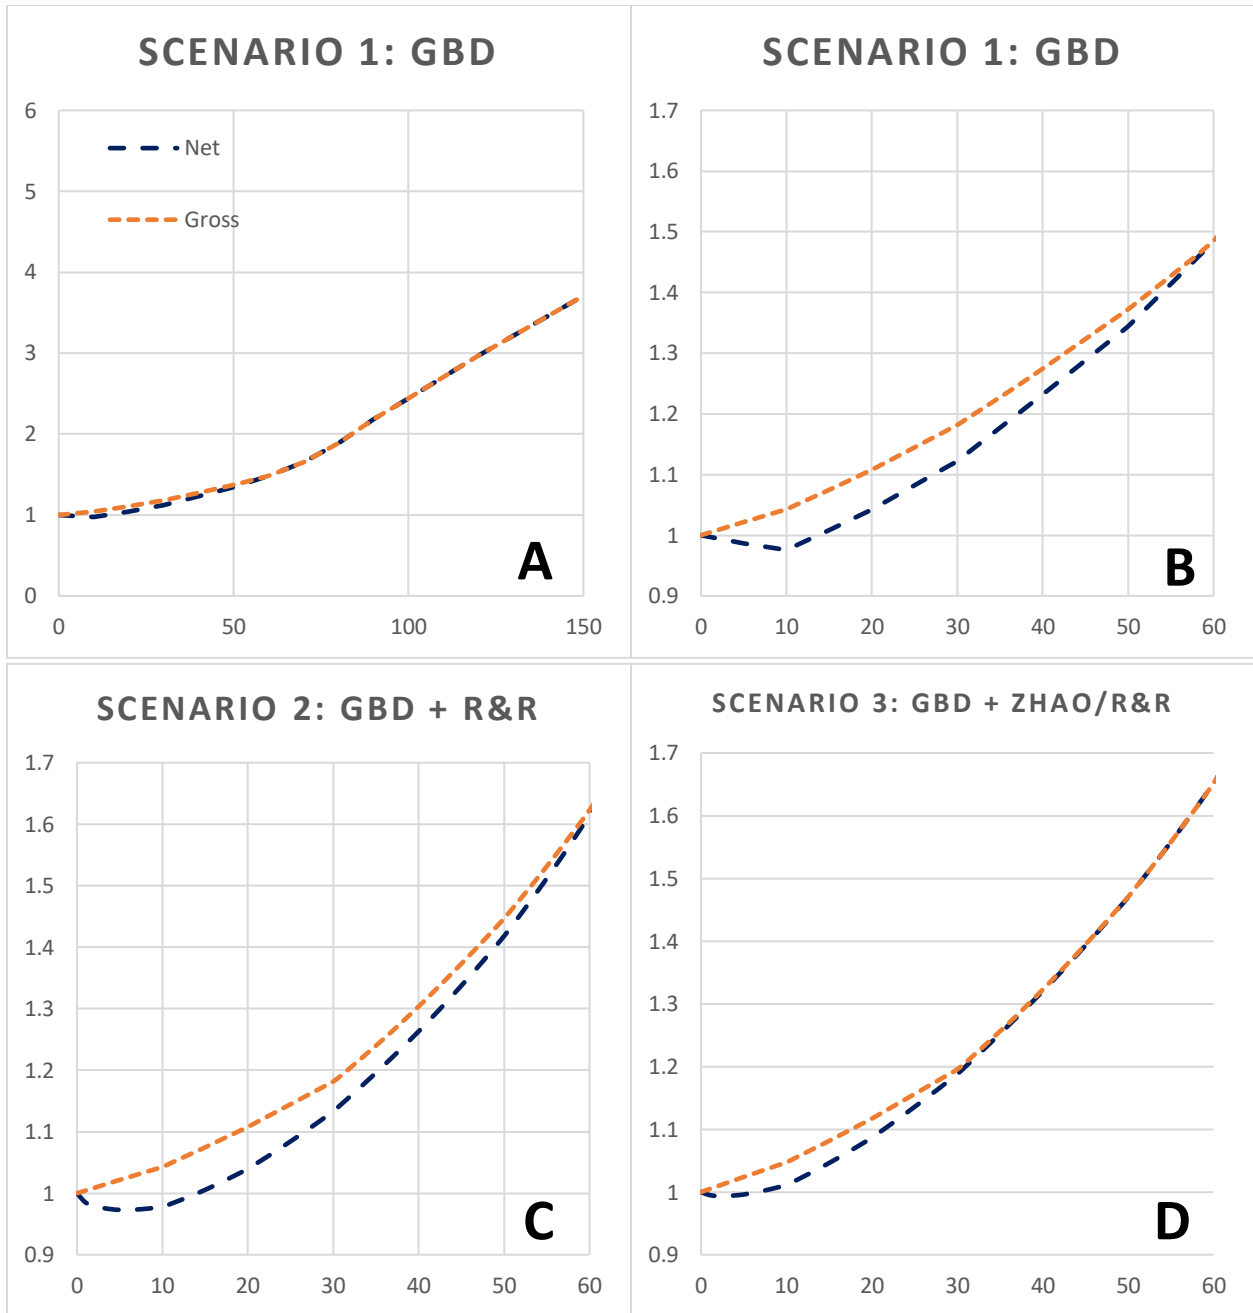

Supplemental Figure S3. Weighted relative risk functions, by harms (net vs. gross) and cardioprotective scenario, Australia, 2015

All Panels: Australia, genders combined, 2015.

Panel A: Cardioprotective scenario 1: GBD, at full scale to emphasize collapsing of net & gross harms at high levels of exposure;

Panel B: Same functions as in Panel A, magnified to a range of 0-60 g/day for resolution;

Panel C: Cardioprotective scenario 2: GBD + R&R, magnified to a range of 0-60 g/day for resolution

Panel D: Cardioprotective scenario 3: GBD + Zhao / R&R, magnified to a range of 0-60 g/day for resolution

y-axis: relative risk; x-axis: average daily alcohol consumption in grams ethanol/day

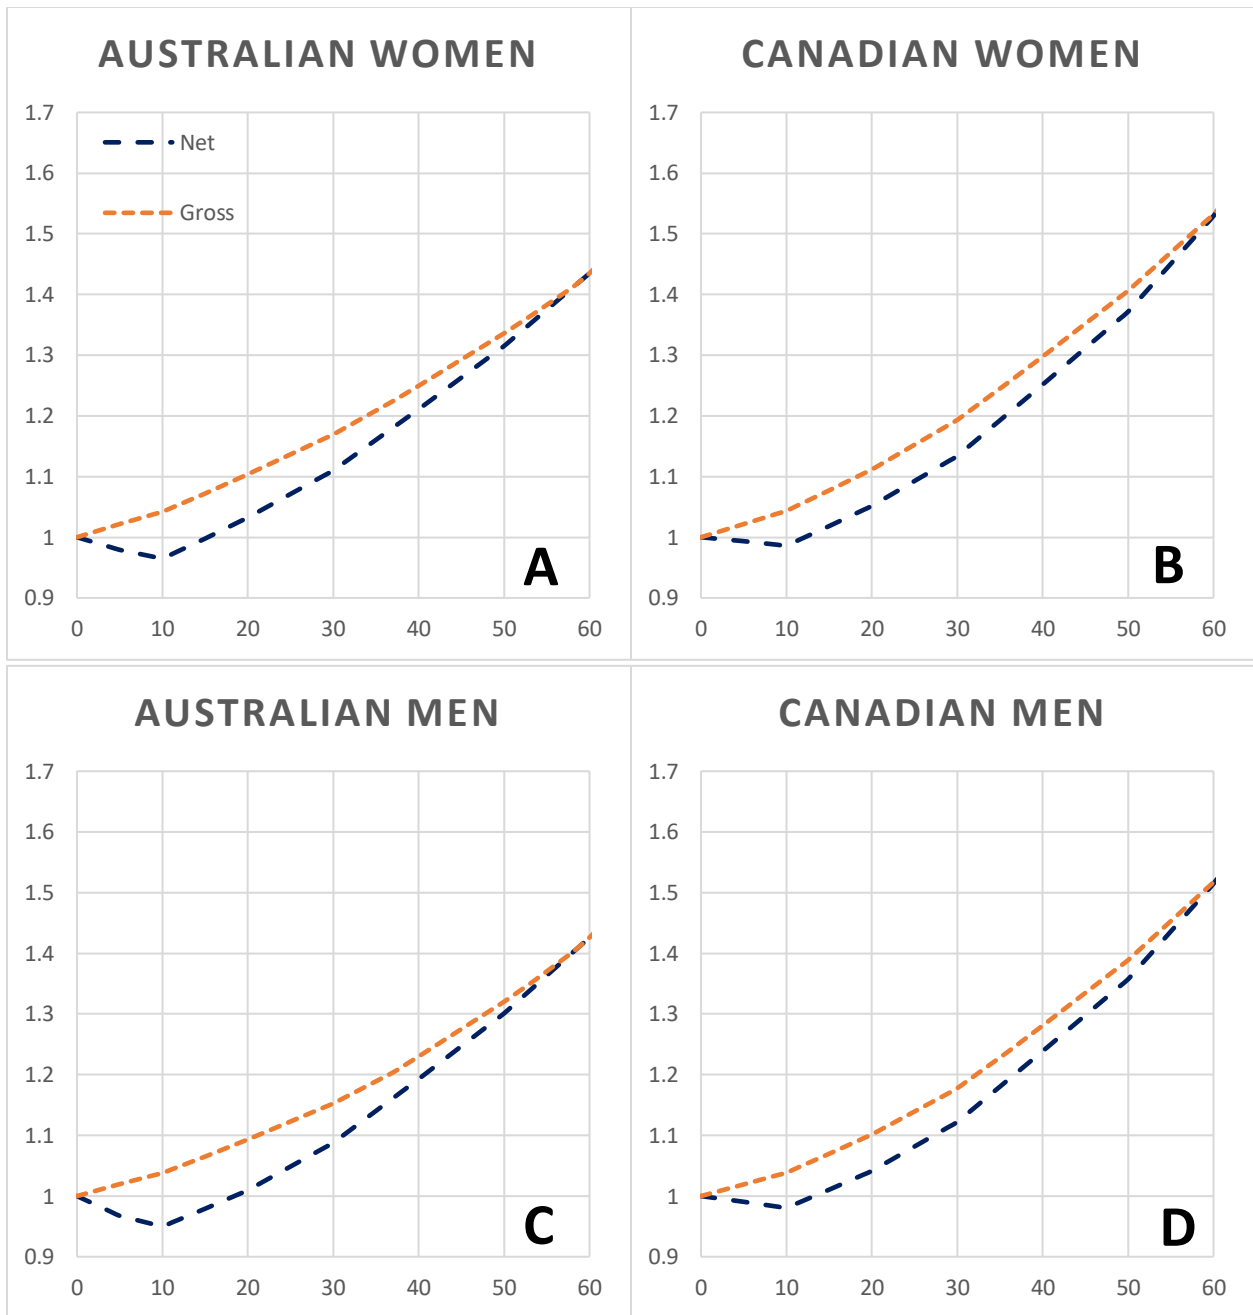

Supplemental Figure S4. Weighted relative risk functions, cardioprotective Scenario 1, by harms (net vs. gross), Australia and Canada, 2015;

Panel A: Australia, women, cardioprotective scenario 1: GBD;

Panel B: Canada, women, cardioprotective scenario 1: GBD;

Panel C: Australia, men, cardioprotective scenario 1: GBD;

Panel D: Canada, men, cardioprotective scenario 1: GBD

y-axis: relative risk; x-axis: average daily alcohol consumption in grams ethanol/day
